# Supplementary material
Source: Springer Nature journal article supplement (https://www.springermedizin.de/resource/supplementary/12883_2013_956_MOESM1_ESM.pdf/9456506)

Georgian data 2009-2010 (n=581)

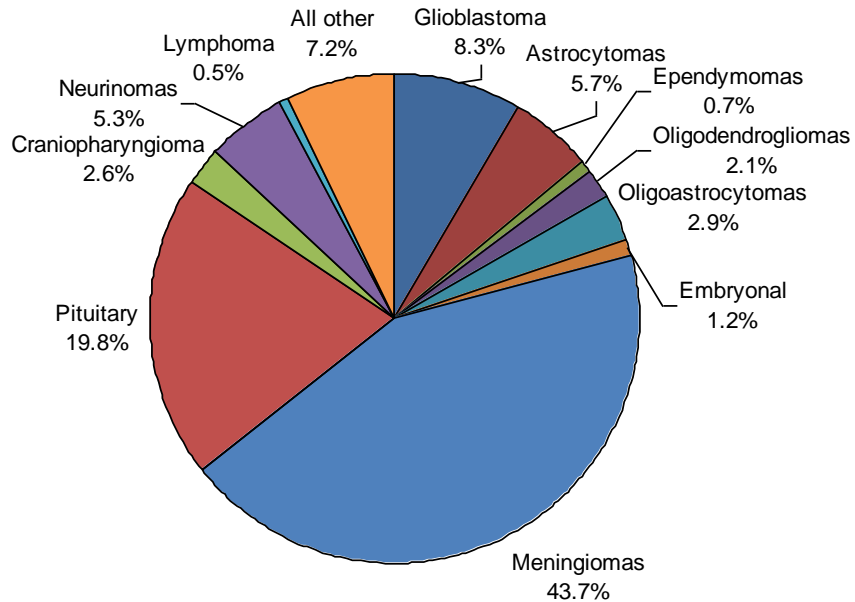

CBTRUS 2004-2005 (n=93429)

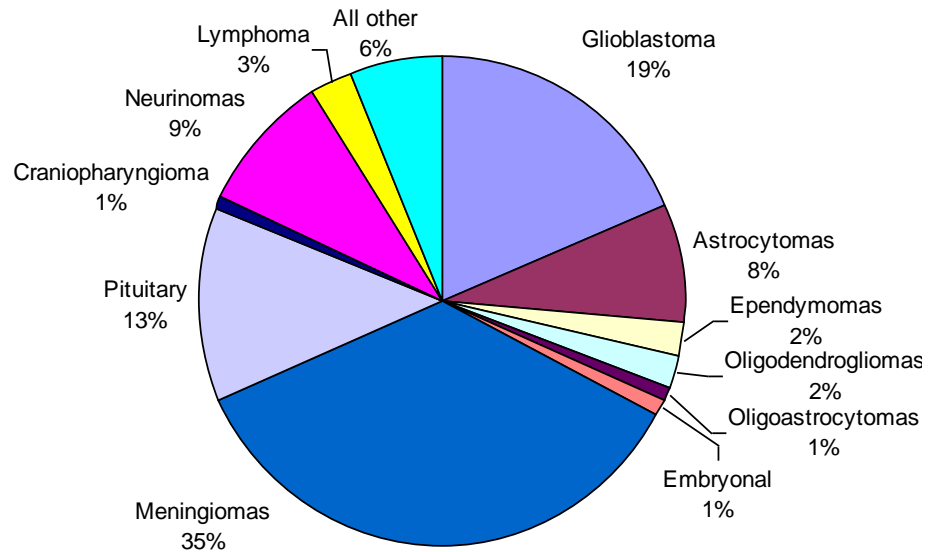

Supplement: MOESM1 [file 9456506]
